# Supplementary material
Source: HighWire-hosted journal article supplement (https://bmjopen.bmj.com/content/14/11/e088431)
Supplement: inline-supplementary-material-1 [file inline-supplementary-material-1.pdf]

|                   |                          |
|-------------------|--------------------------|
| SPONSOR : UBT Srl | STUDY CODE : UBT 2023-01 |
|-------------------|--------------------------|

WOMEN’S SATISFACTION QUESTIONNAIRE

ID number: |\_|\_|\_|\_|\_|\_|\_|

Clinical center number: |\_|\_|\_|

Date: |\_|\_|\_|-|\_|\_|-|\_|\_|\_|\_|\_|\_|  
mm dd yyyy

1. Has the examination been interrupted? ☐ YES ☐ NO

If YES, explain why:

2. Did you find the microwave examination tedious?

Please answer the question by indicating your opinion on a scale of 1 to 3

- ☐ 3 = yes, very much
- ☐ 2 = a little
- ☐ 1 = absolutely not

3. Did you find the microwave examination painful?

Please answer the question by indicating your opinion on a scale of 1 to 3

- ☐ 3 = yes, very much
- ☐ 2 = a little
- ☐ 1 = absolutely not

4. Did you find the microwave examination uncomfortable?

Please answer the question by indicating your opinion on a scale of 1 to 3

- ☐ 3 = yes, very much
- ☐ 2 = a little
- ☐ 1 = absolutely not

|                   |                          |
|-------------------|--------------------------|
| SPONSOR : UBT Srl | STUDY CODE : UBT 2023-01 |
|-------------------|--------------------------|

5. Did you find the examination long-lasting?

Please answer the question by indicating your opinion on a scale of 1 to 3

- ☐ 3 = yes, very much
- ☐ 2 = a little
- ☐ 1 = absolutely not

6. Did you feel adequately informed about the microwave examination?

Please answer the question by indicating your opinion on a scale of 1 to 3

- ☐ 3 = yes, very much
- ☐ 2 = a little
- ☐ 1 = absolutely not

7. Would you recommend the microwave examination?

☐ YES ☐ NO

If NO, explain why:
